# Supplementary material
Source: PubMed Central journal article supplement (PMC6503573)
Supplement: jamainternmed-179-633-s001.pdf [file jamainternmed-179-633-s001.pdf]

## Supplementary Online Content

Lee T-Y, Hsu Y-C, Tseng H-C, et al. Association of daily aspirin therapy with risk of hepatocellular carcinoma in patients with chronic hepatitis B. *JAMA Intern Med*. Published online March 18, 2019.  
doi:10.1001/jamainternmed.2018.8342

**eMethods.** The ICD Codes Used in This Study

**eFigure 1.** Cumulative Incidence of Hepatocellular Carcinoma Development in Aspirin-Treated (Continuous Aspirin Use for at Least 1 Year) or Untreated Groups

**eFigure 2.** Cumulative Incidence of Hepatocellular Carcinoma Development in Aspirin-Treated (Continuous Aspirin Use for at Least 2 Years) or Untreated Groups

**eFigure 3.** Cumulative Incidence of Peptic Ulcer Bleeding in the Aspirin-Treated or Untreated Groups

**eFigure 4.** Cumulative incidence of Peptic Ulcer Bleeding Among Cirrhotic or Non-Cirrhotic Patients in the Aspirin-Treated Group

**eFigure 5.** Cumulative Incidence of Peptic Ulcer Bleeding in Typical Aspirin Users With Liver Disease (Chronic Hepatitis B) or Without Liver Disease

**eTable.** Demographic Characteristics of Typical Patients Who Received Daily Aspirin Therapy for Cardiovascular Diseases

**eFigure 6.** Cumulative Incidence of Suicide in the Aspirin-Treated or Untreated Groups

**eFigure 7.** Cumulative Incidence of Hip Fracture in the Aspirin-Treated or Untreated Groups

**eFigure 8.** The Proportion of Patients Continuing Aspirin Therapy During the Study Period

This supplementary material has been provided by the authors to give readers additional information about their work.

### eMethods. The ICD Codes Used in This Study

|    |                                      | ICD9-CODE                                                                                                                                                                                                      |
|----|--------------------------------------|----------------------------------------------------------------------------------------------------------------------------------------------------------------------------------------------------------------|
| 1  | Chronic hepatitis B                  | 【070.2】 【070.3】 【V02.61】                                                                                                                                                                                       |
| 2  | Chronic hepatitis C                  | 【07041】 【07044】 【07051】 【07054】<br>【V0262】 【070.7】                                                                                                                                                             |
| 3  | Other viral hepatitis                | 【573.2】 【573.1】                                                                                                                                                                                                |
| 4  | Human immunodeficiency virus disease | 【042】                                                                                                                                                                                                          |
| 5  | Alcoholic liver disease              | 【571.0】 【571.3】                                                                                                                                                                                                |
| 6  | Cirrhosis                            | 【571.2】 【571.5】 【571.6】                                                                                                                                                                                        |
| 7  | Liver decompensation                 | 【789.5】 【572.2】 【572.4】                                                                                                                                                                                        |
| 8  | Diabetes mellitus                    | 【250】 【648.0】                                                                                                                                                                                                  |
| 9  | Hyperlipidemia                       | 【272.0】 – 【272.4】                                                                                                                                                                                              |
| 10 | Hypertension                         | 【401】 – 【405】                                                                                                                                                                                                  |
| 11 | Coronary arterial disease            | 【410】 – 【414】                                                                                                                                                                                                  |
| 12 | Cerebral vascular disease            | 【430】 – 【438】                                                                                                                                                                                                  |
| 13 | Cardiac dysrhythmias                 | 【427】                                                                                                                                                                                                          |
| 14 | Peripheral vascular disease          | 【443】                                                                                                                                                                                                          |
| 15 | Hepatocellular carcinoma             | 【155.0】                                                                                                                                                                                                        |
| 16 | Peptic ulcer bleeding                | 【531.0】 【531.1】 【531.2】 【531.4】<br>【531.5】 【531.6】 【532.0】 【532.1】<br>【532.2】 【532.4】 【532.5】 【532.6】<br>【533.0】 【533.1】 【533.2】 【533.4】<br>【533.5】 【533.6】 【534.0】 【534.1】<br>【534.2】 【534.4】 【534.5】 【534.6】 |
| 17 | Suicide                              | 【E950】 – 【E958】 【E980】 – 【E988】                                                                                                                                                                                |
| 18 | Hip fracture                         | 【820】 【733.14】 【733.96】                                                                                                                                                                                        |

**eFigure 1. Cumulative Incidence of Hepatocellular Carcinoma Development in Aspirin-Treated (Continuous Aspirin Use for at Least 1 Year) or Untreated Groups**

Follow-up from 1 year after the initiation of aspirin therapy.

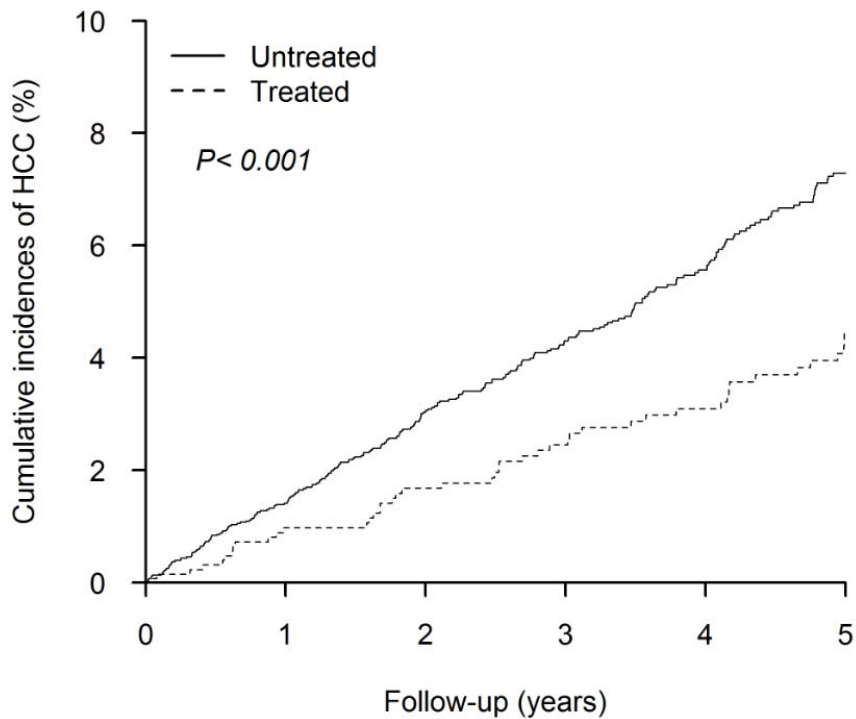

| Number at risk |      | Follow-up (years) |      |      |      |      |  |
|----------------|------|-------------------|------|------|------|------|--|
|                | 0    | 1                 | 2    | 3    | 4    | 5    |  |
| Untreated      | 5112 | 3894              | 3026 | 2230 | 1622 | 1133 |  |
| Treated        | 1278 | 1120              | 994  | 838  | 684  | 571  |  |

**eFigure 2. Cumulative Incidence of Hepatocellular Carcinoma Development in Aspirin-Treated (Continuous Aspirin Use for at Least 2 Years) or Untreated Groups**

Follow-up from 2 years after the initiation of aspirin therapy.

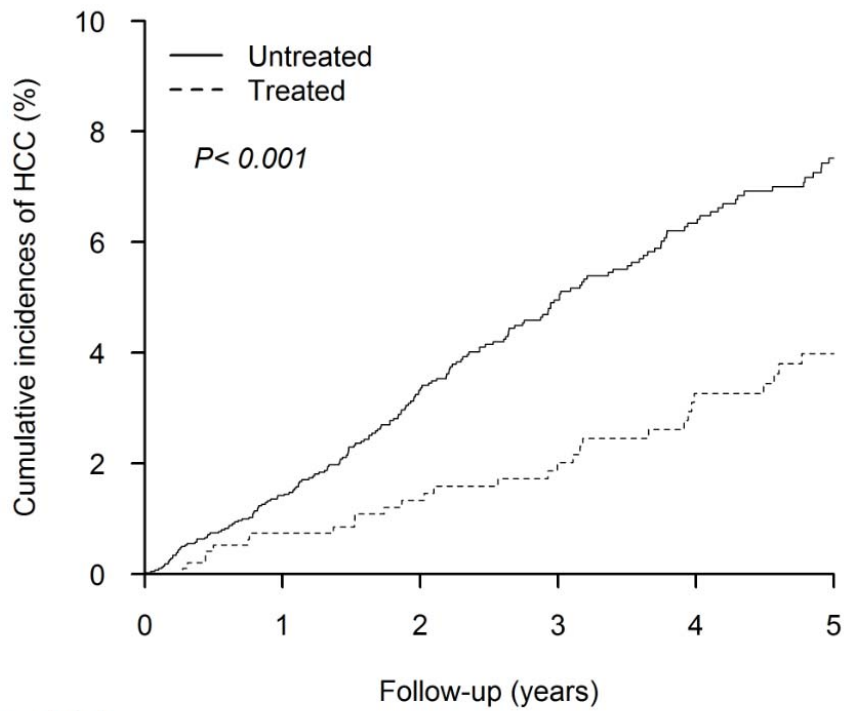

| Number at risk |      | Follow-up (years) |      |      |      |     |  |
|----------------|------|-------------------|------|------|------|-----|--|
|                | 0    | 1                 | 2    | 3    | 4    | 5   |  |
| Untreated      | 3872 | 2913              | 2038 | 1451 | 1040 | 730 |  |
| Treated        | 968  | 853               | 715  | 577  | 489  | 386 |  |

**eFigure 3. Cumulative Incidence of Peptic Ulcer Bleeding in the Aspirin-Treated or Untreated Groups**

Follow-up from the initiation of aspirin therapy.

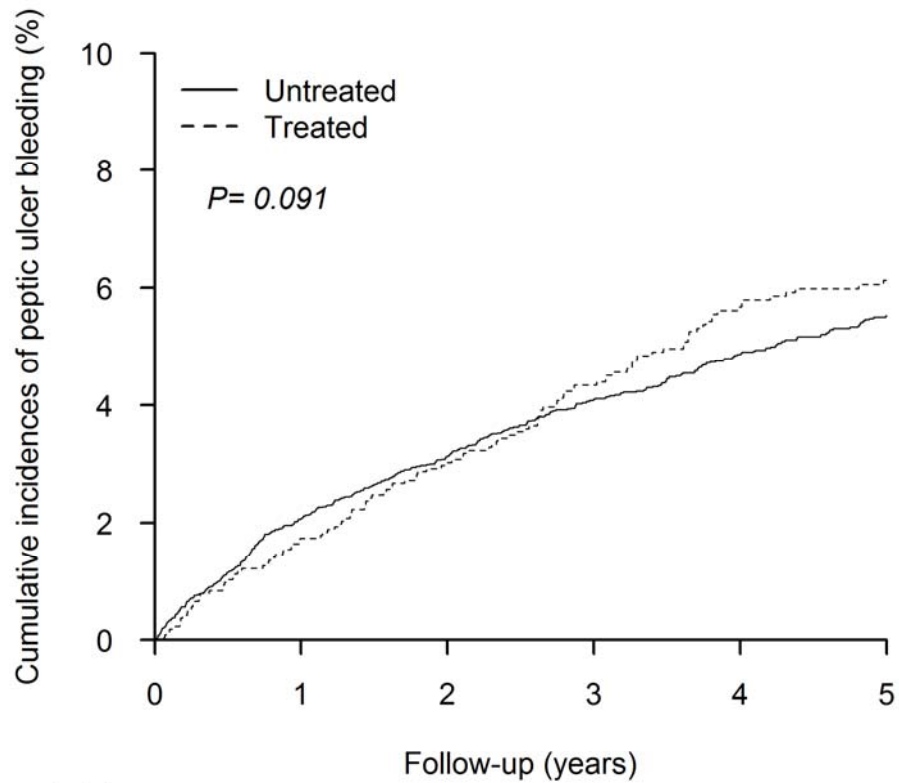

| Number at risk |      | Follow-up (years) |      |      |      |      |  |
|----------------|------|-------------------|------|------|------|------|--|
|                | 0    | 1                 | 2    | 3    | 4    | 5    |  |
| Untreated      | 8492 | 8084              | 7096 | 6249 | 5036 | 4048 |  |
| Treated        | 2123 | 2054              | 1901 | 1747 | 1508 | 1293 |  |

**eFigure 4. Cumulative incidence of Peptic Ulcer Bleeding Among Cirrhotic or Non-Cirrhotic Patients in the Aspirin-Treated Group**

Follow-up from the initiation of aspirin therapy.

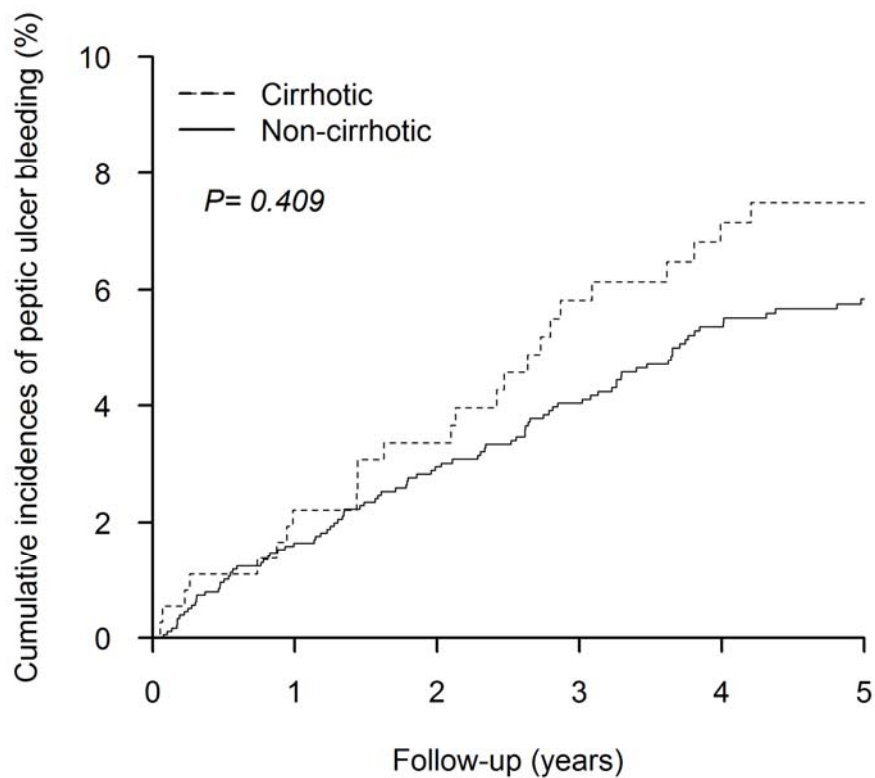

| Number at risk |      | Follow-up (years) |      |      |      |      |  |
|----------------|------|-------------------|------|------|------|------|--|
|                | 0    | 1                 | 2    | 3    | 4    | 5    |  |
| Cirrhotic      | 362  | 348               | 324  | 295  | 265  | 242  |  |
| Non-cirrhotic  | 1761 | 1706              | 1577 | 1452 | 1243 | 1051 |  |

**eFigure 5. Cumulative Incidence of Peptic Ulcer Bleeding in Typical Aspirin Users With Liver Disease (Chronic Hepatitis B) or Without Liver Disease**

Follow-up from the initiation of aspirin therapy.

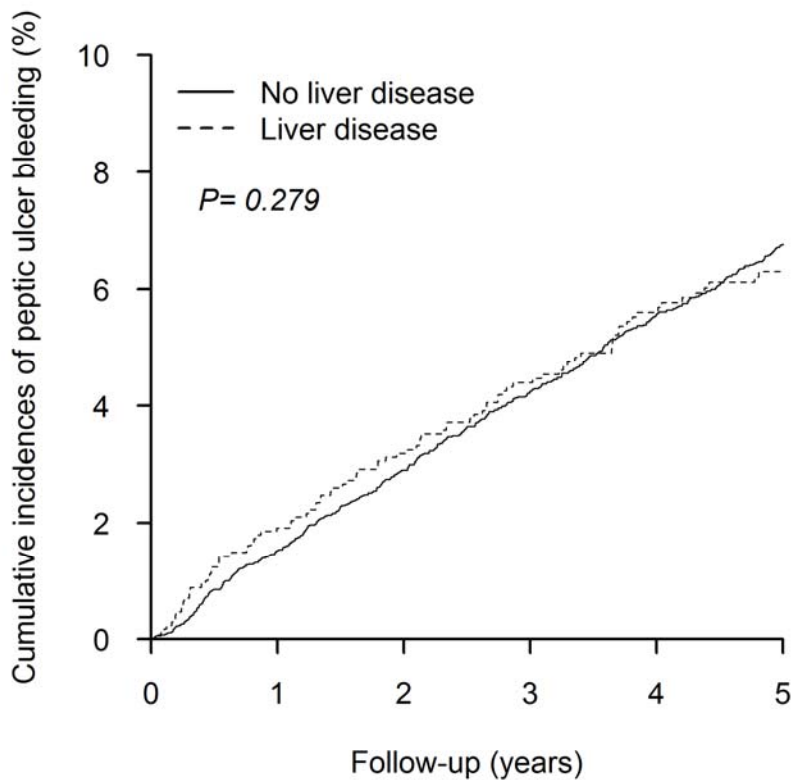

|                  |  | Follow-up (years) |      |      |      |      |      |
|------------------|--|-------------------|------|------|------|------|------|
| Number at risk   |  | 0                 | 1    | 2    | 3    | 4    | 5    |
| No liver disease |  | 6724              | 6438 | 6102 | 5722 | 5143 | 4469 |
| Liver disease    |  | 1681              | 1559 | 1407 | 1261 | 1034 | 847  |

**eTable. Demographic Characteristics of Typical Patients Who Received Daily Aspirin****Therapy for Cardiovascular Diseases**

| Characteristics                 | Liver disease<br>n = 1,681 | No liver diseases<br>n = 6,724 | P value |
|---------------------------------|----------------------------|--------------------------------|---------|
| Age, years                      |                            |                                |         |
| Mean ± SD                       | 60.9 ± 11.5                | 60.8 ± 11.5                    | 0.69    |
| Median (IQR)                    | 61.4 (52.4-69.4)           | 61.4 (52.2-69.3)               | 0.72    |
| Sex, n (%)                      |                            |                                | 0.87    |
| Male                            | 1241 (73.8%)               | 4948 (73.6%)                   |         |
| Female                          | 440 (26.2%)                | 1776 (26.4%)                   |         |
| Underlying comorbidities, n (%) |                            |                                |         |
| Coronary arterial disease       | 603 (35.9%)                | 2475 (36.8%)                   | 0.49    |
| Cerebral vascular disease       | 733 (43.6%)                | 2928 (43.6%)                   | 0.99    |
| Diabetes mellitus               | 802 (47.7%)                | 3274 (48.7%)                   | 0.49    |
| Hyperlipidemia                  | 606 (36.1%)                | 2424 (36.1%)                   | 1.00    |
| Hypertension                    | 1156 (68.8%)               | 4642 (69.0%)                   | 0.86    |
| Drug use                        |                            |                                |         |
| Metformin                       | 603 (35.9%)                | 2477 (36.8%)                   | 0.48    |
| Statin                          | 507 (30.16)                | 2119 (31.5%)                   | 0.30    |
| Proton pump inhibitor           | 4 (0.24%)                  | 16 (0.24%)                     | 1.00    |
| NSAID                           | 277 (16.5%)                | 1008 (15.0%)                   | 0.14    |

Abbreviations: SD, standard deviation; IQR, interquartile range; NSAID: non-steroidal anti-inflammatory drug



**eFigure 6. Cumulative Incidence of Suicide in the Aspirin-Treated or Untreated Groups**

Follow-up from the initiation of aspirin therapy.

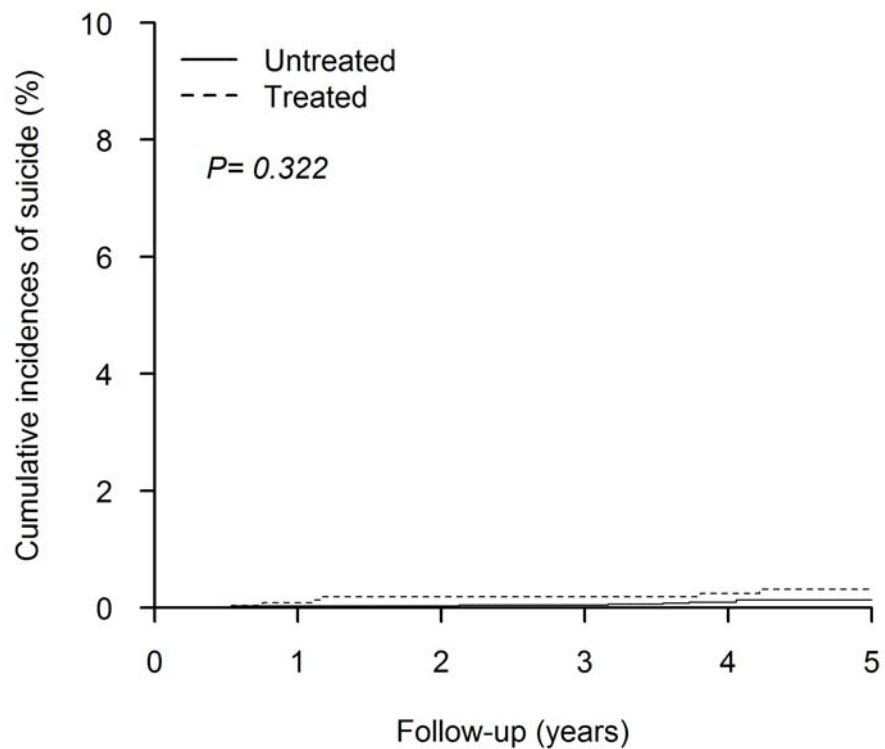

| Number at risk |      | Follow-up (years) |      |      |      |      |  |
|----------------|------|-------------------|------|------|------|------|--|
|                | 0    | 1                 | 2    | 3    | 4    | 5    |  |
| Untreated      | 8492 | 8011              | 6479 | 5314 | 4002 | 3005 |  |
| Treated        | 2123 | 2060              | 1838 | 1624 | 1352 | 1110 |  |

**eFigure 7. Cumulative Incidence of Hip Fracture in the Aspirin-Treated or Untreated Groups**

Follow-up from the initiation of aspirin therapy

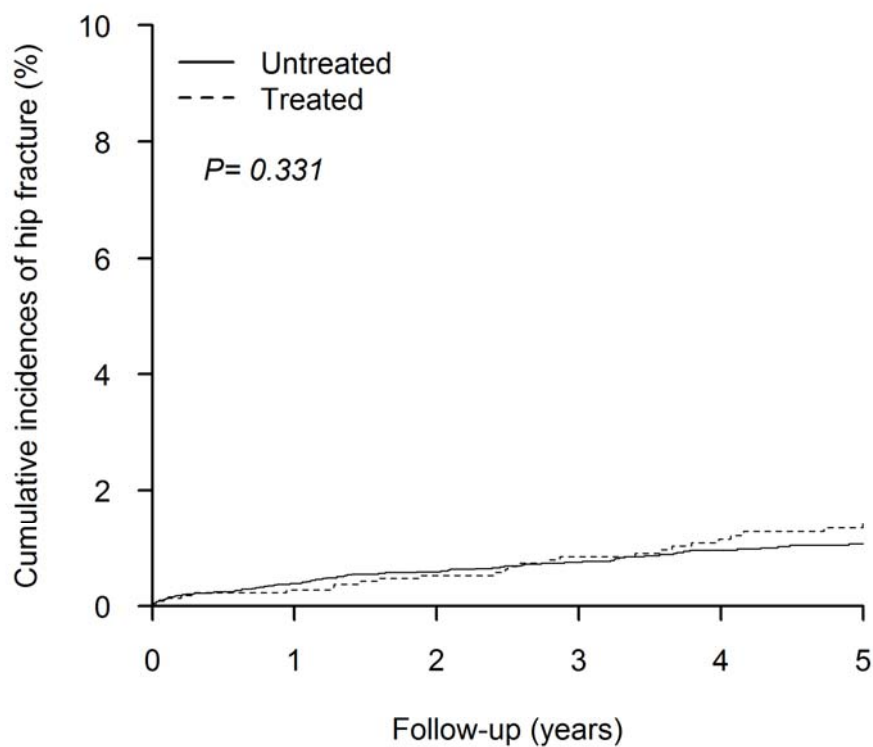

| Number at risk |  | Follow-up (years) |      |      |      |      |      |
|----------------|--|-------------------|------|------|------|------|------|
|                |  | 0                 | 1    | 2    | 3    | 4    | 5    |
| Untreated      |  | 8492              | 7981 | 6440 | 5280 | 3976 | 2989 |
| Treated        |  | 2123              | 2056 | 1833 | 1613 | 1340 | 1093 |

**eFigure 8. The Proportion of Patients Continuing Aspirin Therapy During the Study Period**

Follow-up from the initiation of aspirin therapy.

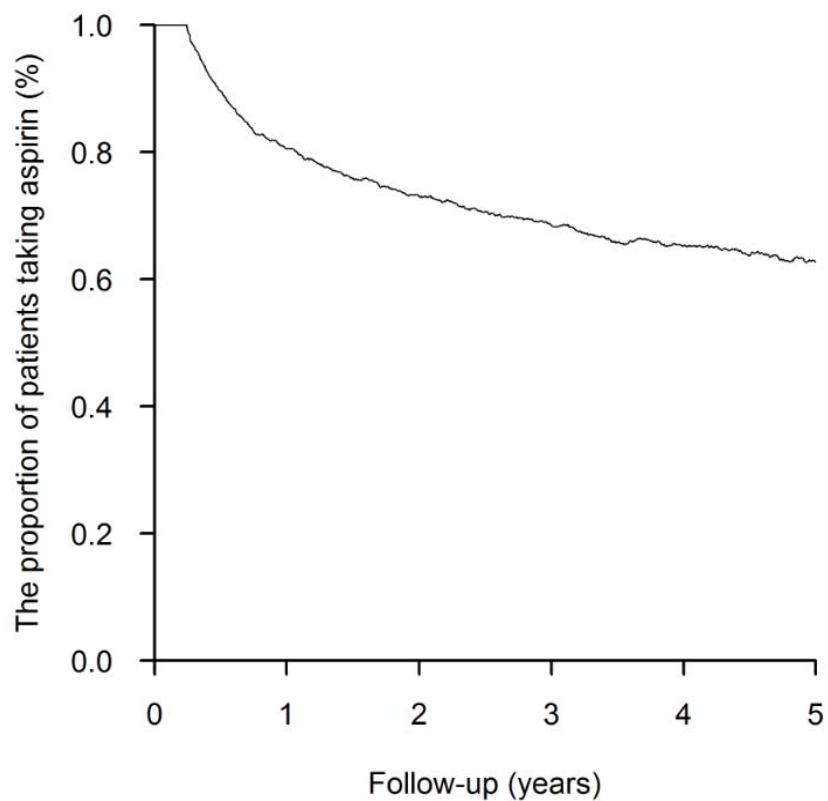

|             |      |      |      |      |      |      |
|-------------|------|------|------|------|------|------|
| Case number | 2123 | 2056 | 1817 | 1595 | 1324 | 1082 |
|-------------|------|------|------|------|------|------|
